# Supplementary material for: Simplified Pediatric Index of Mortality 3 Score by Explainable Machine Learning Algorithm
Source: PubMed Central journal article supplement — Crit Care Explor. 2021 Oct 19;3(10):e0561. doi: 10.1097/CCE.0000000000000561 (PMC8528230; doi:10.1097/cce.0000000000000561), 2021-10-19
Supplement: cc9-3-e0561-s003.pdf [file cc9-3-e0561-s003.pdf]

# Input variables, SHAP value of each variable and calibration plots for individual machine learning (ML) models

## ML model #1

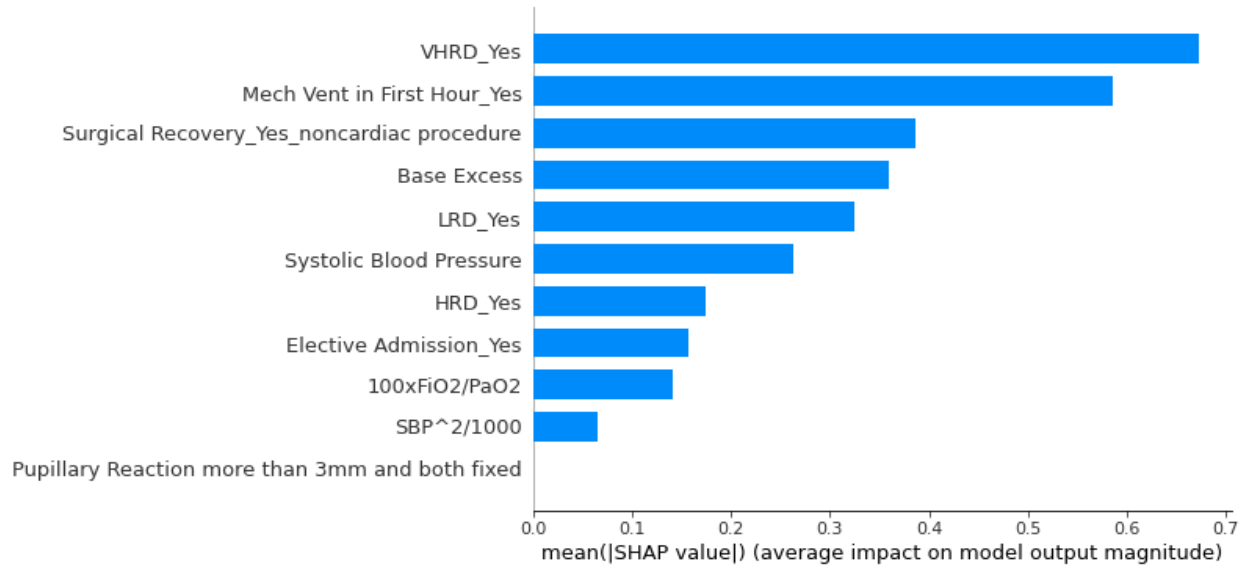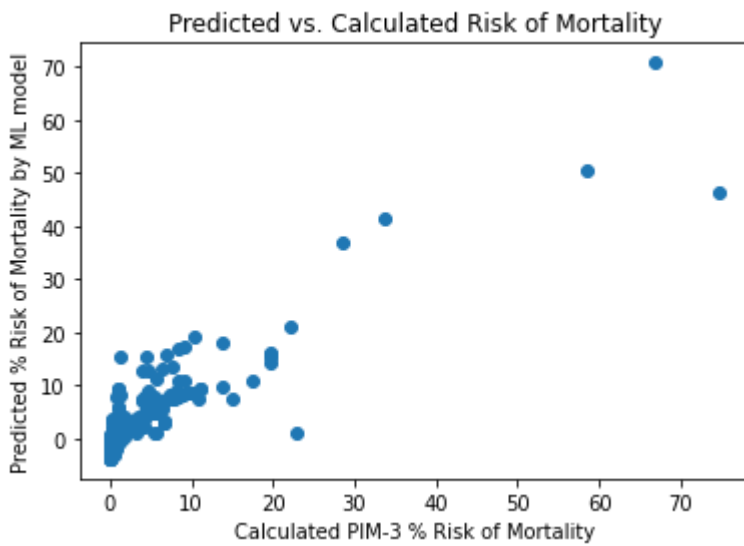

Mean RMSE [95% CI]= 2.028 (1.425, 2.630)

Mean MAE [95% CI]= 0.428 (0.347, 0.509)

Mean R2 [95% CI]= 0.508 (0.196, 0.820)

## ML model #2

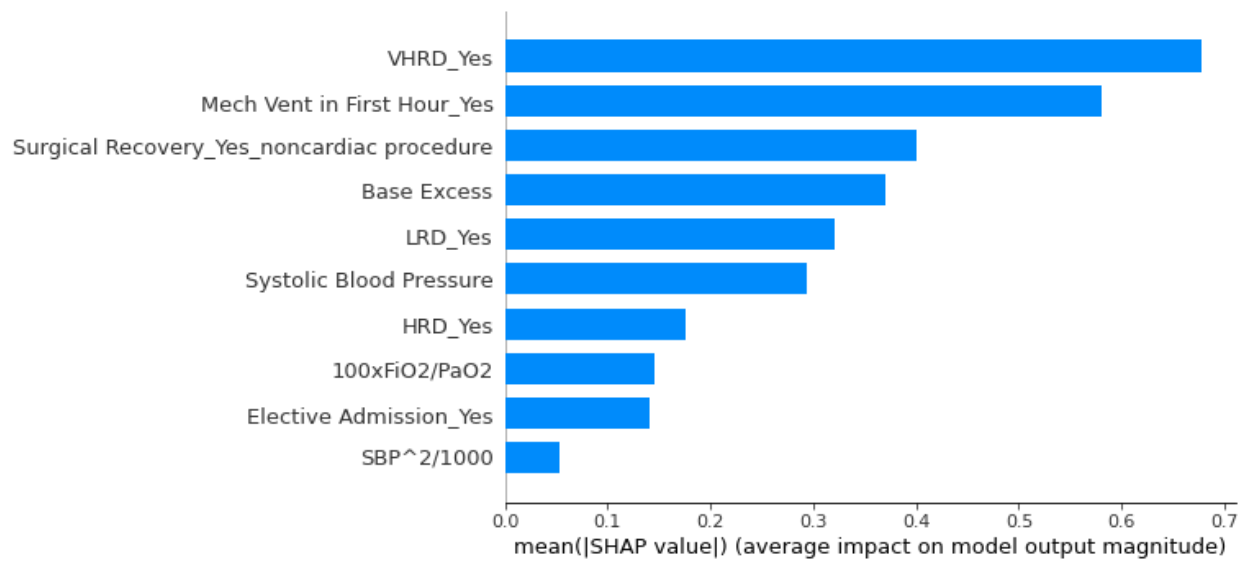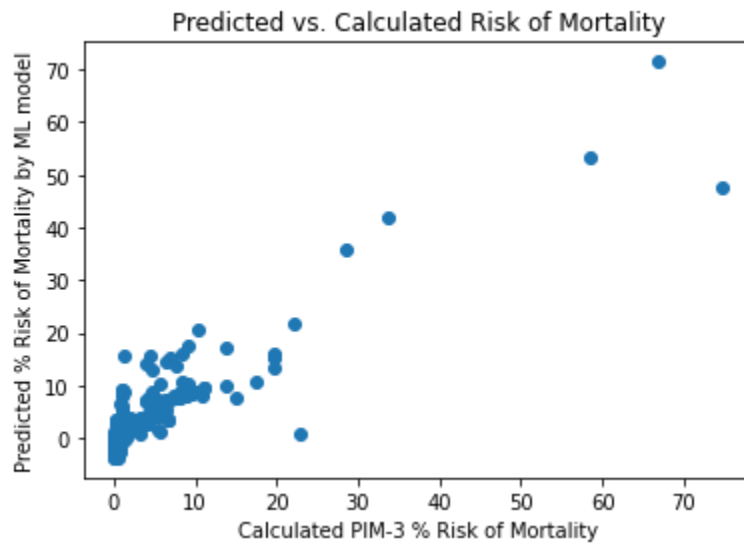

Mean RMSE [95% CI]= 2.001 (1.407, 2.595)

Mean MAE [95% CI]= 0.425 (0.346, 0.503)

Mean R2 [95% CI]= 0.506 (0.174, 0.838)

### ML model #3

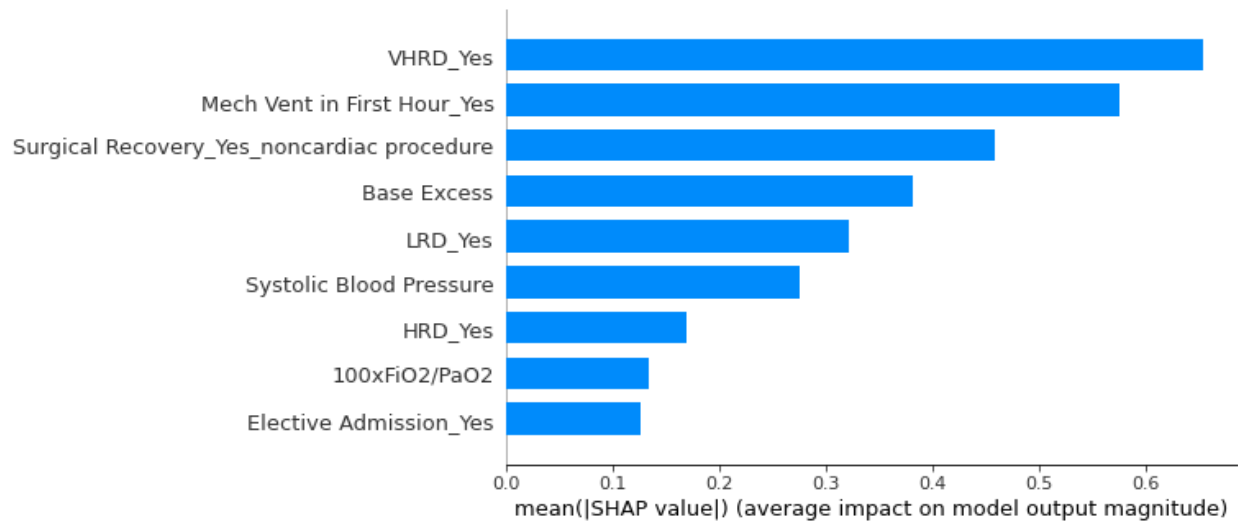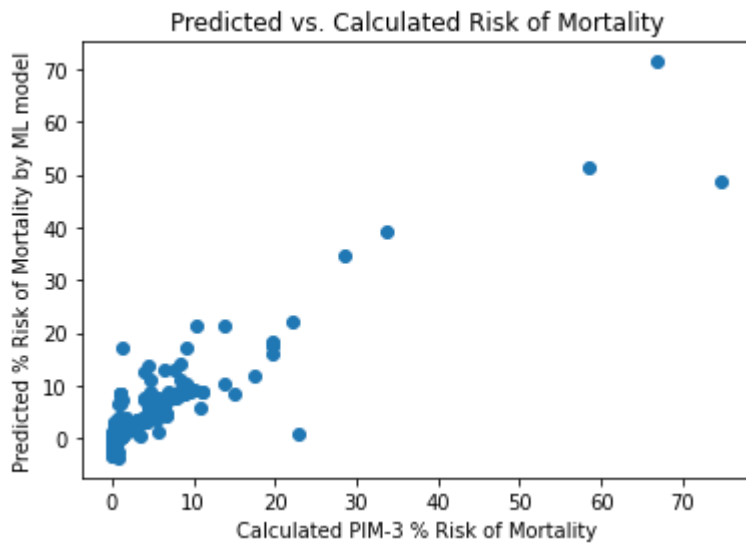

Mean RMSE [95% CI]= 1.997 (1.398, 2.596)

Mean MAE [95% CI]= 0.424 (0.338, 0.511)

Mean R2 [95% CI]= 0.549 (0.305, 0.792)

## ML model #4

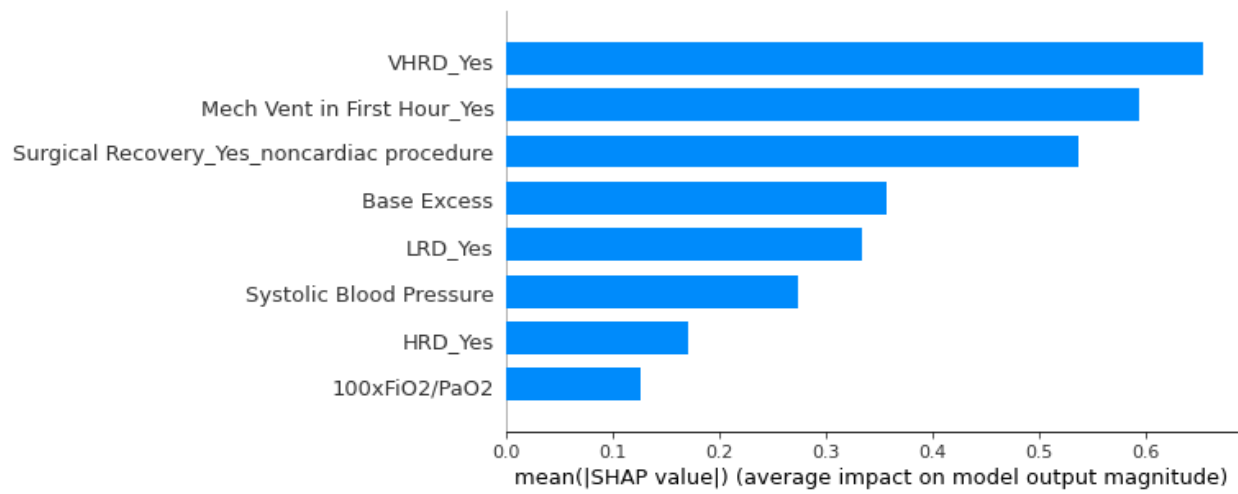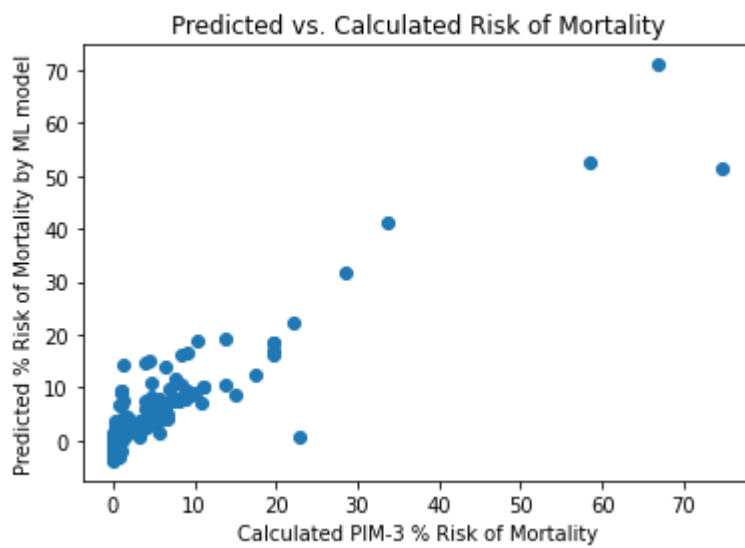

Mean RMSE [95% CI]= 1.965 (1.397, 2.533)

Mean MAE [95% CI]= 0.422 (0.338, 0.506)

Mean R2 [95% CI]= 0.566 (0.333, 0.799)

## ML model #5

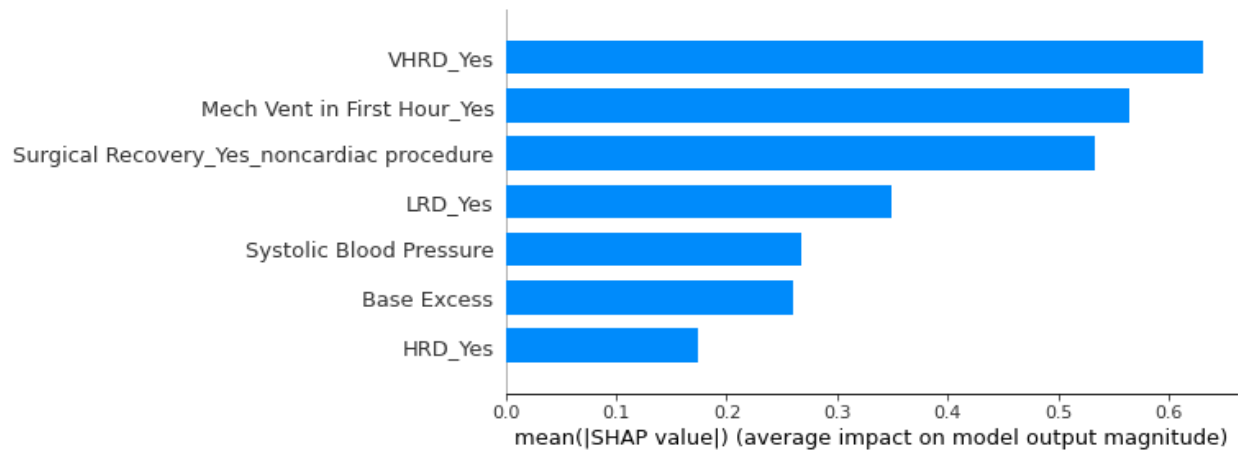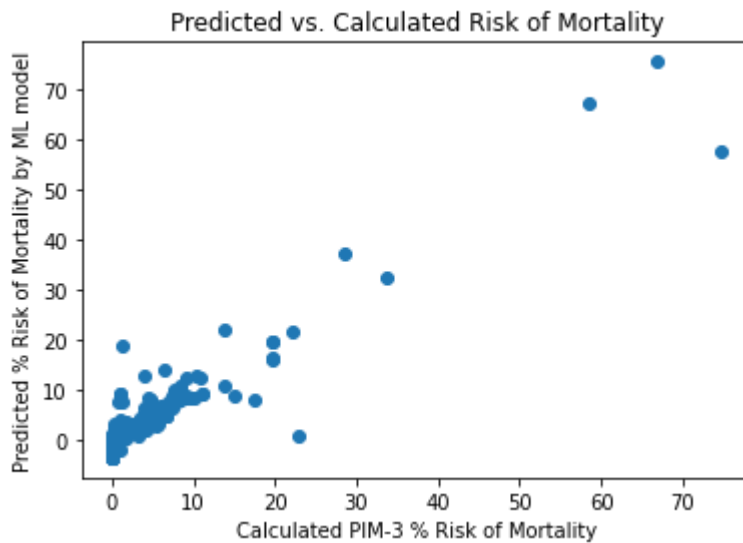

Mean RMSE [95% CI]= 1.808 (1.321, 2.295)

Mean MAE [95% CI]= 0.385 (0.319, 0.451)

Mean R2 [95% CI]= 0.545 (0.234, 0.856)

## ML model #6

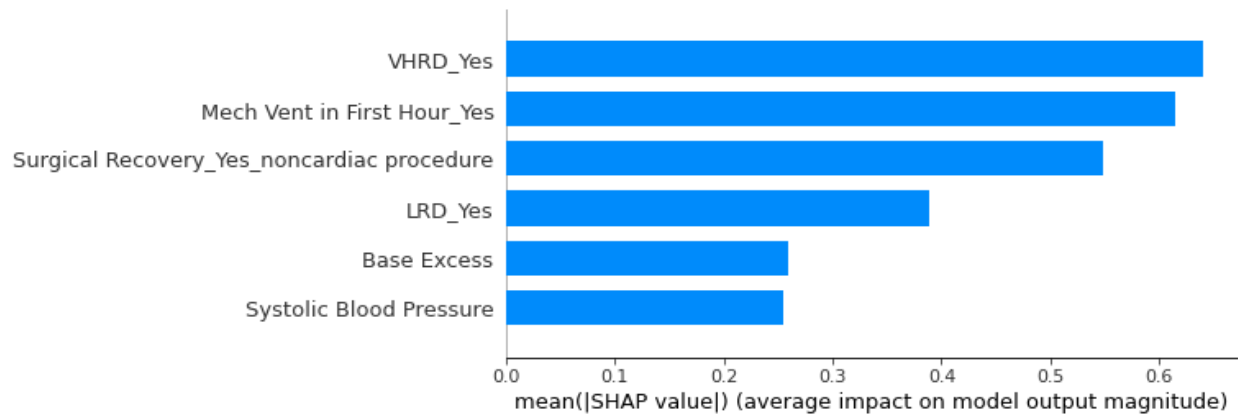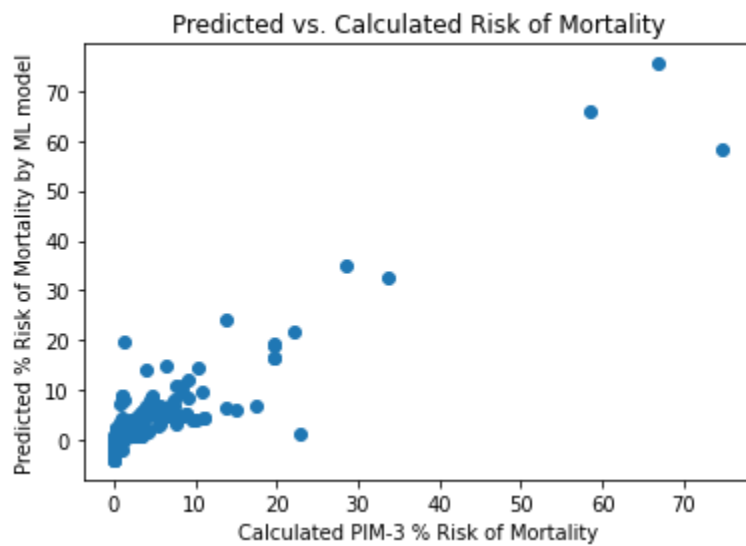

Mean RMSE [95% CI]= 1.970 (1.515, 2.426)

Mean MAE [95% CI]= 0.543 (0.465, 0.621)

Mean R2 [95% CI]= 0.463 (0.109, 0.818)

## ML model #7

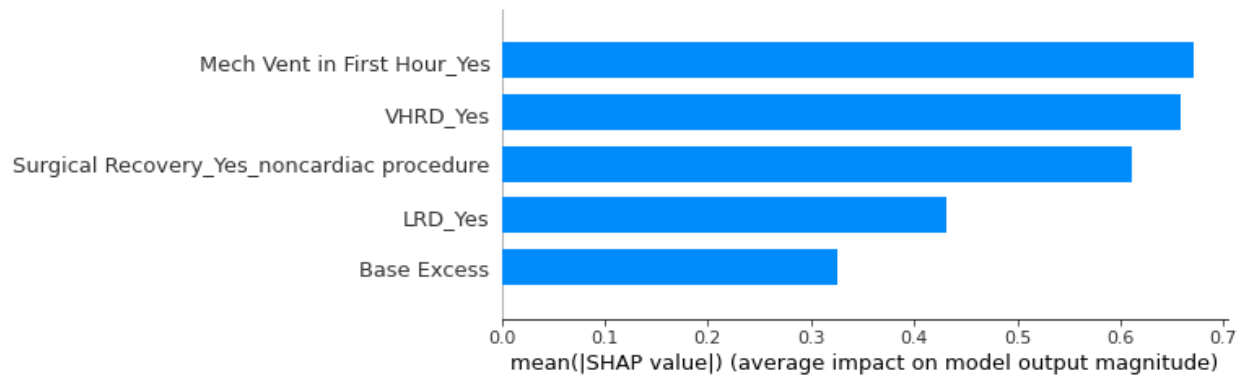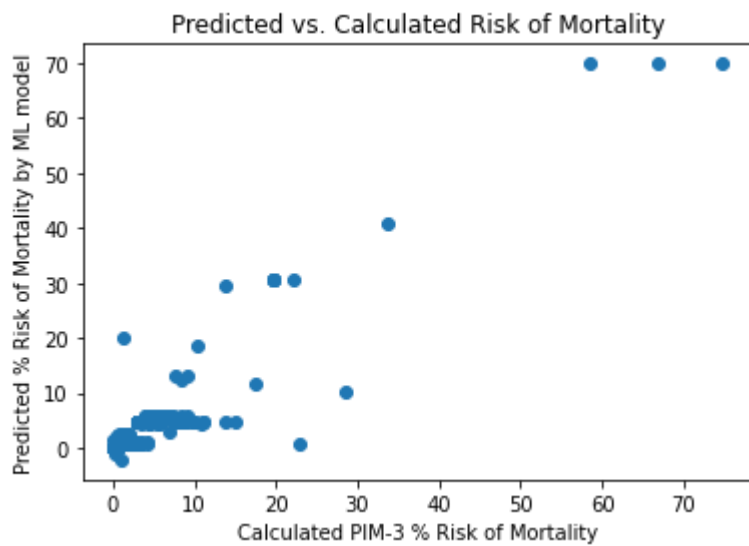

Mean RMSE [95% CI]= 1.492 (1.051, 1.934)

Mean MAE [95% CI]= 0.426 (0.351, 0.501)

Mean R2 [95% CI]= 0.730 (0.598, 0.862)

## ML model #8

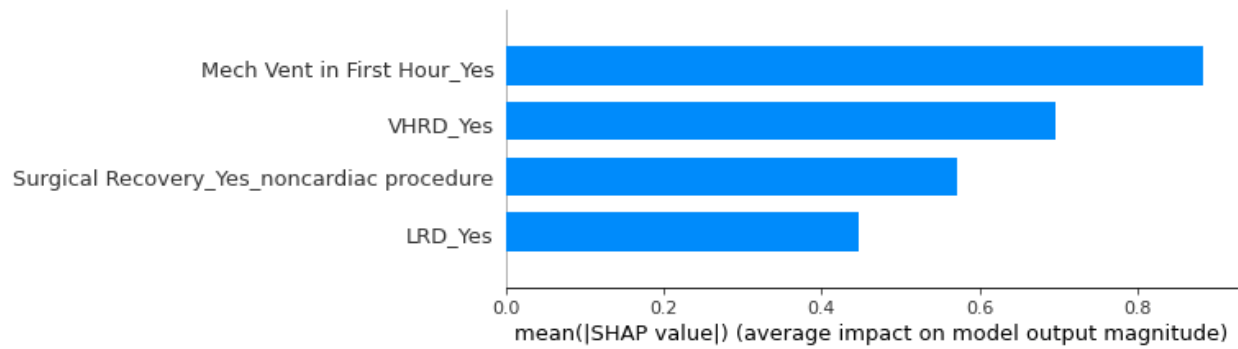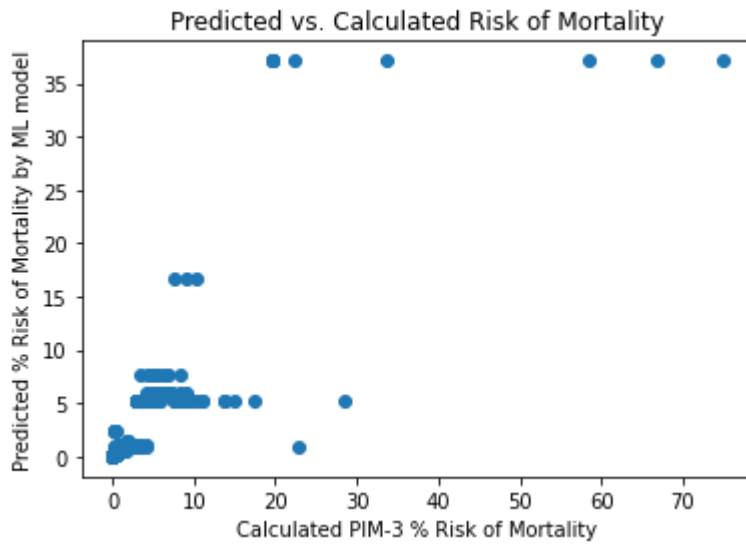

Mean RMSE [95% CI]= 2.148 (1.459, 2.837)

Mean MAE [95% CI]= 0.547 (0.448, 0.646)

Mean R2 [95% CI]= 0.584 (0.480, 0.687)



## ML model #9

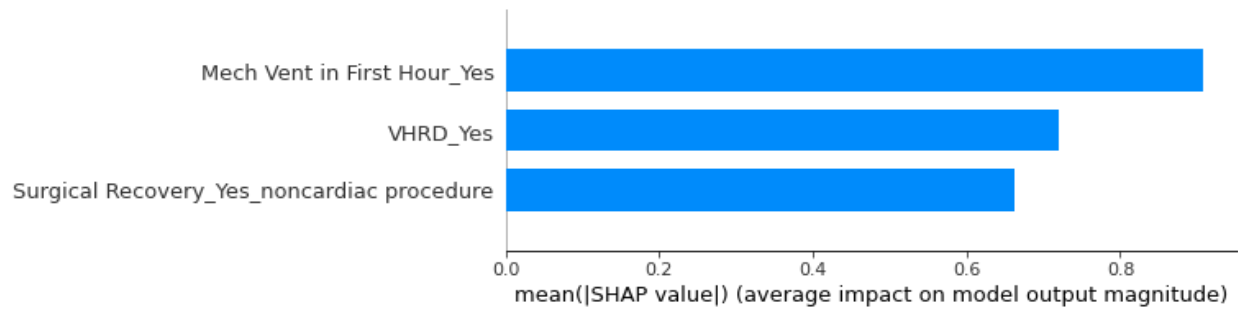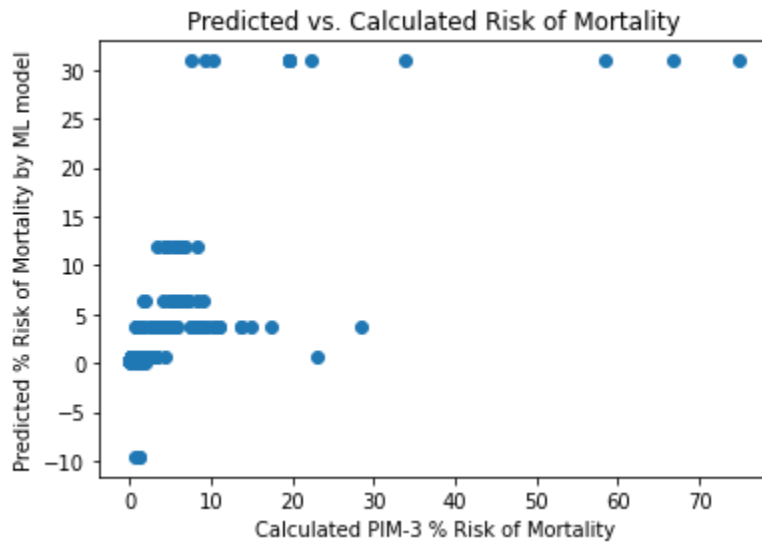

Mean RMSE [95% CI]= 2.543 (1.789, 3.298)

Mean MAE [95% CI]= 0.746 (0.635, 0.857)

Mean R2 [95% CI]= 0.358 (0.111, 0.605)

## ML model #10

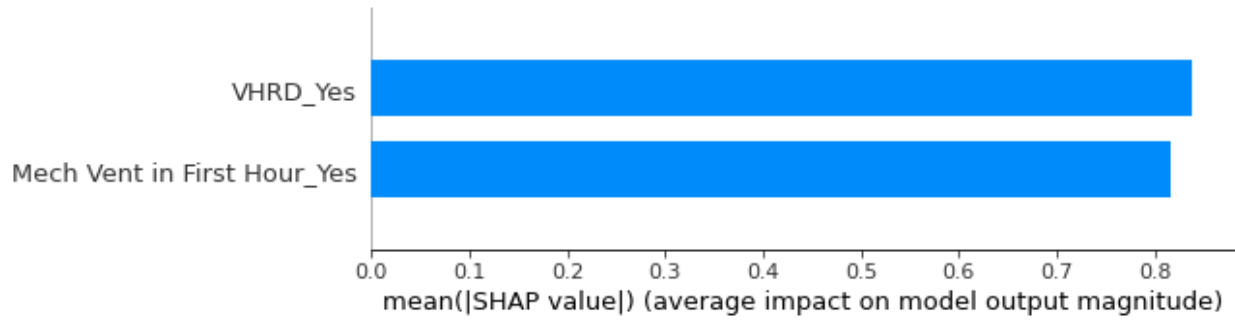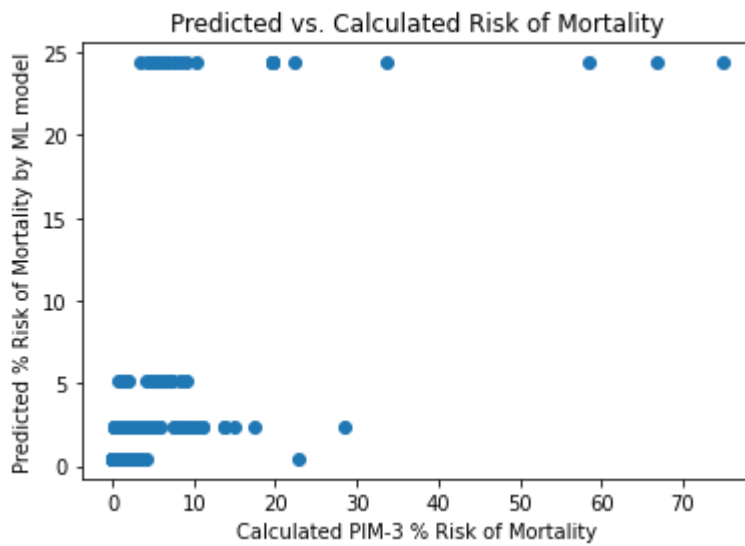

Mean RMSE [95% CI]= 2.866 (1.984, 3.747)

Mean MAE [95% CI]= 0.902 (0.760, 1.043)

Mean R2 [95% CI]= 0.028 (-0.671, 0.727)

## ML model #11

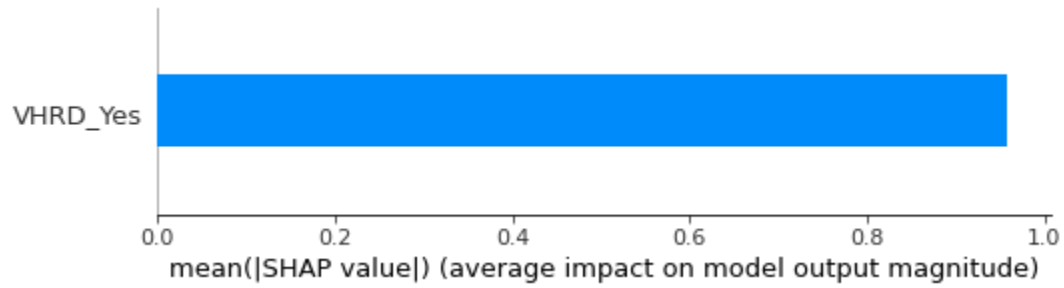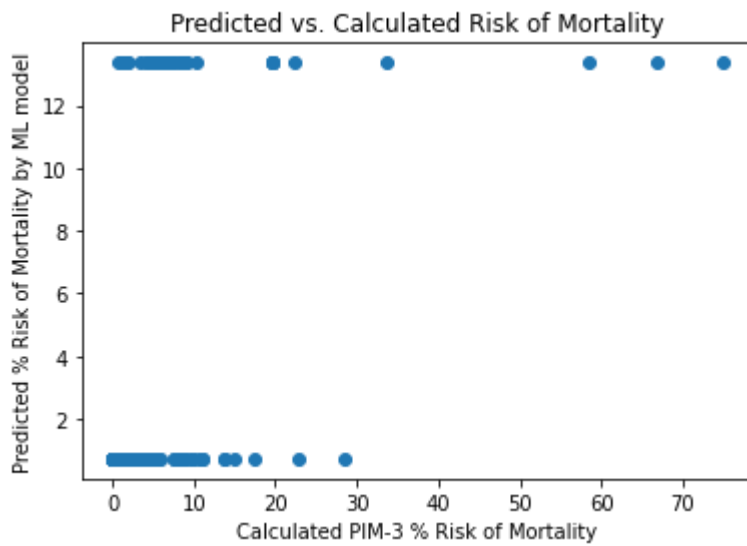

Mean RMSE [95% CI]= 3.216 (2.216, 4.217)

Mean MAE [95% CI]= 1.055 (0.919, 1.190)

Mean R2 [95% CI]= 0.018 (-0.319, 0.355)
